# Supplementary material
Source: MDPI journal article supplement (https://www.mdpi.com/1424-8247/15/2/119)
Supplement: s1 [file s1]

# Supplementary Information

## First *In Silico* Screening of Insect Molecules for Identification of Novel Anti-Parasitic Compounds

Tom L. Gallinger <sup>1</sup>, Samuel Y. Aboagye <sup>2</sup>, Wiebke Obermann <sup>1</sup>, Michael Weiss <sup>3</sup>, Arnold Grünweller <sup>1</sup>, Carlo Unverzagt <sup>3</sup>, David L. Williams <sup>2</sup>, Martin Schlitzer <sup>1</sup>, Simone Haeberlein <sup>4,\*</sup>

<sup>1</sup> Department of Pharmaceutical Chemistry, Philipps University Marburg, Marburg, Germany

<sup>2</sup> Department of Microbial Pathogens and Immunity, Rush University Medical Center, Chicago, Illinois, United States

<sup>3</sup> Bioorganic Chemistry, University of Bayreuth, Bayreuth, Germany

<sup>4</sup> Institute of Parasitology, Justus Liebig University Giessen, Giessen, Germany

\* Correspondence: [simone.haeberlein@vetmed.uni-giessen.de](mailto:simone.haeberlein@vetmed.uni-giessen.de); Tel.: +49-6419938476

| Table of Contents                                 | Page |
|---------------------------------------------------|------|
| Docking Results of Ligand 1                       | 2    |
| Docking Results of Ligand 2                       | 3    |
| Docking Results of Ligand 3                       | 4    |
| Docking Results of Ligand 4                       | 5    |
| Docking Results of Ligand 5                       | 6    |
| Docking Results of Ligand 6                       | 7    |
| Docking Results of Ligand 7                       | 8    |
| Docking Results of Ligand 8                       | 9    |
| Docking Results of Ligand 9                       | 10   |
| Docking Results of Ligand 10                      | 11   |
| Redocking of 1,8-naphthyridine-2-carboxylate (A1) | 12   |

## Docking Results of Ligand 1

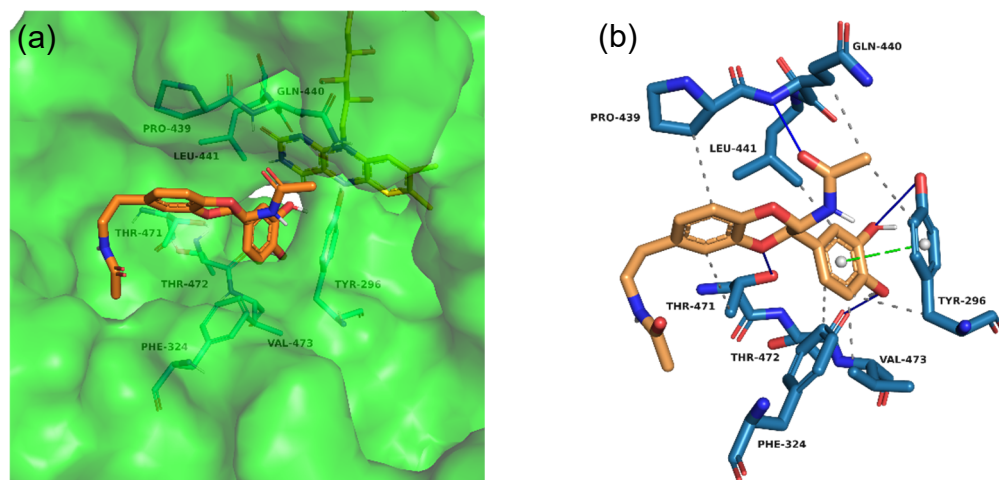

**Figure S1.** Interactions between **1** and SmTGR displayed as docking pose (a) and PLIP analysis (b). The part of the molecule occupying the doorstep pocket is predicted to interact with THR471 and 472 and TYR296 by hydrogen bonding and  $\pi$ - $\pi$  interactions (TYR296) as well as hydrophobic interactions (TYR296, PHE324). The central amide moiety shows hydrogen bonding with the main side chain of GLN440. Orange sticks – insect molecule, yellow sticks – FAD, dashed grey lines – hydrophobic interactions, blue lines – hydrogen bonds, dashed green lines –  $\pi$ -stacking (parallel), orange dashed lines – salt bridge.

**Table S1:** Interactions between **1** and SmTGR as observed in the PLIP analysis.

### Hydrophobic Interactions

| Index | Residue | AA  | Distance | Ligand Atom | Protein Atom |
|-------|---------|-----|----------|-------------|--------------|
| 1     | 296A    | TYR | 3.68     | 18          | 4503         |
| 2     | 296A    | TYR | 3.64     | 4           | 4508         |
| 3     | 324A    | PHE | 3.20     | 14          | 4933         |
| 4     | 439A    | PRO | 3.94     | 12          | 6717         |
| 5     | 440A    | GLN | 3.56     | 4           | 6731         |
| 6     | 441A    | LEU | 2.76     | 13          | 6751         |
| 7     | 471A    | THR | 3.91     | 15          | 7209         |
| 8     | 473A    | VAL | 3.25     | 18          | 7238         |

### Hydrogen Bonds

| Index | Residue | AA  | Distance H-A | Distance D-A | Donor Angle | Protein donor? | Side chain | Donor Atom | Acceptor Atom |
|-------|---------|-----|--------------|--------------|-------------|----------------|------------|------------|---------------|
| 1     | 296A    | TYR | 3.16         | 3.78         | 122.61      | ✗              | ✓          | 20 [O2]    | 4510 [O3]     |
| 2     | 440A    | GLN | 2.10         | 2.93         | 162.03      | ✓              | ✗          | 6727 [Nam] | 1 [O3]        |
| 3     | 471A    | THR | 2.30         | 3.04         | 147.30      | ✓              | ✓          | 7210 [O3]  | 9 [O2]        |
| 4     | 472A    | THR | 1.90         | 2.85         | 164.42      | ✗              | ✗          | 23 [O2]    | 7221 [O2]     |

### $\pi$ -Stacking

| Index | Residue | AA  | Distance | Angle | Offset | Stacking Type | Ligand Atoms           |
|-------|---------|-----|----------|-------|--------|---------------|------------------------|
| 1     | 296A    | TYR | 3.69     | 20.46 | 0.33   | P             | 10, 13, 14, 17, 18, 21 |

## Docking Results of Ligand 2

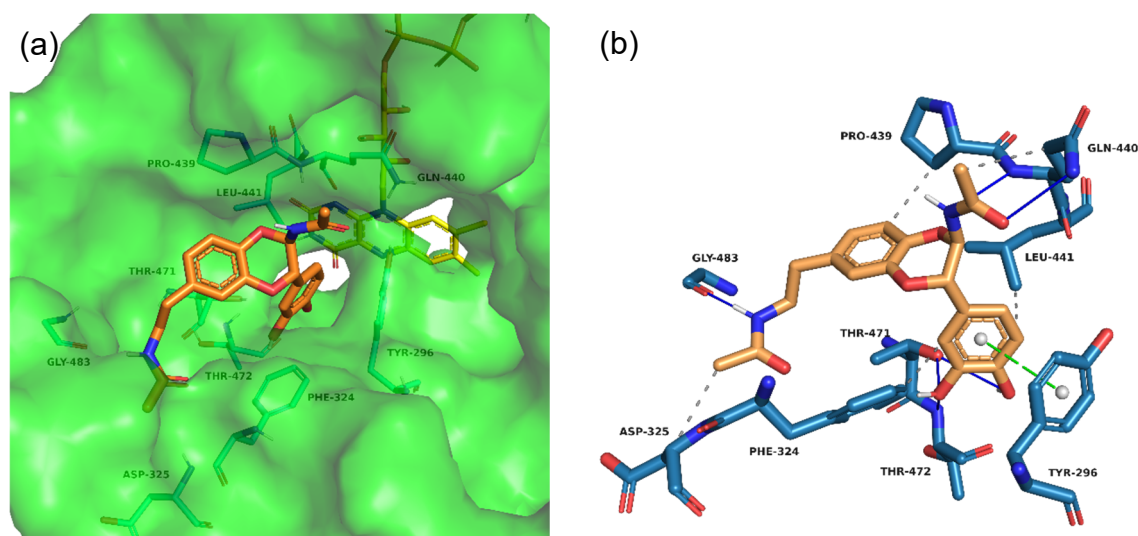

**Figure S2.** Interactions between **2** and SmTGR displayed as docking pose (a) and PLIP analysis (b). Compared to the interactions described for **1** in SI Figure 1, analysis of ligand **2** revealed that its terminal amide-NH is able to form a hydrogen bond with the main chain GLY483 carbonyl oxygen but not with TYR296. This ligand is thereby also targeting the HEPE subpocket. Orange sticks – insect molecule, yellow sticks – FAD, dashed grey lines – hydrophobic interactions, blue lines – hydrogen bonds, dashed green lines –  $\pi$ -stacking (parallel), orange dashed lines – salt bridge.

**Table S2:** Interactions between **2** and SmTGR as observed in the PLIP analysis.

### Hydrophobic Interactions

| Index | Residue | AA  | Distance | Ligand Atom | Protein Atom |
|-------|---------|-----|----------|-------------|--------------|
| 1     | 324A    | PHE | 3.18     | 13          | 4933         |
| 2     | 325A    | ASP | 4.00     | 28          | 4947         |
| 3     | 439A    | PRO | 3.16     | 12          | 6717         |
| 4     | 440A    | GLN | 3.67     | 4           | 6732         |
| 5     | 441A    | LEU | 3.14     | 18          | 6751         |

### Hydrogen Bonds

| Index | Residue | AA  | Distance H-A | Distance D-A | Donor Angle | Protein donor? | Side chain | Donor Atom | Acceptor Atom |
|-------|---------|-----|--------------|--------------|-------------|----------------|------------|------------|---------------|
| 1     | 440A    | GLN | 2.66         | 3.48         | 161.04      | ✓              | ✗          | 6727 [Nam] | 3 [N3]        |
| 2     | 440A    | GLN | 2.42         | 3.16         | 144.88      | ✓              | ✓          | 6734 [Nam] | 1 [O3]        |
| 3     | 471A    | THR | 2.17         | 2.57         | 109.30      | ✓              | ✓          | 7210 [O3]  | 20 [O2]       |
| 4     | 471A    | THR | 2.83         | 3.47         | 123.60      | ✗              | ✓          | 23 [O2]    | 7210 [O3]     |
| 5     | 472A    | THR | 3.82         | 4.10         | 102.68      | ✓              | ✗          | 7218 [Nam] | 20 [O2]       |
| 6     | 483A    | GLY | 1.98         | 2.83         | 139.15      | ✗              | ✗          | 25 [N3]    | 7382 [O2]     |

### $\pi$ -Stacking

| Index | Residue | AA  | Distance | Angle | Offset | Stacking Type | Ligand Atoms           |
|-------|---------|-----|----------|-------|--------|---------------|------------------------|
| 1     | 296A    | TYR | 4.02     | 28.77 | 1.39   | P             | 10, 13, 14, 17, 18, 21 |

## Docking Results of Ligand 3

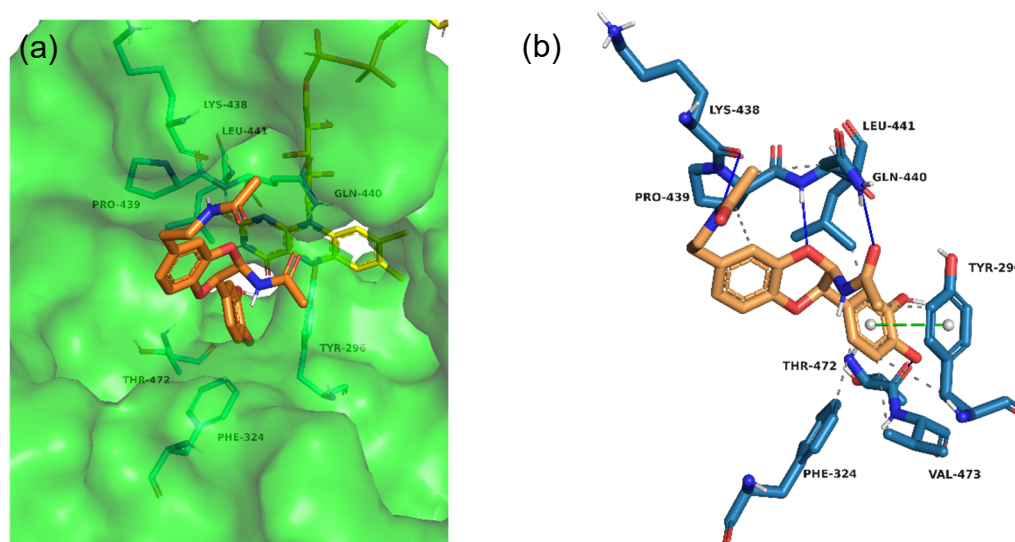

**Figure S3.** Interactions between **3** and SmtGR displayed as docking pose (a) and PLIP analysis (b). Compared to the docking pose described for **1** in SI Figure 1, analysis of ligand **3** revealed that this isomer does not stick out to the left (HEPE subpocket) or right (NADPH subpocket), but rather upwards. By doing this, it is able to undergo additional hydrogen bonds with GLN440-NH and LYS438. Orange sticks – insect molecule, yellow sticks – FAD, dashed grey lines – hydrophobic interactions, blue lines – hydrogen bonds, dashed green lines –  $\pi$ -stacking (parallel), orange dashed lines – salt bridge.

**Table S3:** Interactions between **3** and SmtGR as observed in the PLIP analysis.

### Hydrophobic Interactions

| Index | Residue | AA  | Distance | Ligand Atom | Protein Atom |
|-------|---------|-----|----------|-------------|--------------|
| 1     | 296A    | TYR | 3.69     | 18          | 4503         |
| 2     | 296A    | TYR | 3.51     | 4           | 4508         |
| 3     | 324A    | PHE | 3.09     | 14          | 4933         |
| 4     | 439A    | PRO | 3.78     | 12          | 6717         |
| 5     | 440A    | GLN | 3.92     | 28          | 6732         |
| 6     | 441A    | LEU | 2.46     | 13          | 6751         |
| 7     | 473A    | VAL | 3.75     | 18          | 7238         |

### Hydrogen Bonds

| Index | Residue | AA  | Distance H-A | Distance D-A | Donor Angle | Protein donor? | Side chain | Donor Atom | Acceptor Atom |
|-------|---------|-----|--------------|--------------|-------------|----------------|------------|------------|---------------|
| 1     | 438A    | LYS | 2.28         | 3.24         | 156.93      | ✗              | ✗          | 25 [N3]    | 6694 [O2]     |
| 2     | 440A    | GLN | 2.12         | 2.96         | 166.07      | ✓              | ✗          | 6727 [Nam] | 6 [O2]        |
| 3     | 440A    | GLN | 2.33         | 3.18         | 169.81      | ✓              | ✓          | 6734 [Nam] | 1 [O3]        |
| 4     | 472A    | THR | 2.07         | 3.01         | 163.50      | ✗              | ✗          | 24 [O2]    | 7221 [O2]     |

### $\pi$ -Stacking

| Index | Residue | AA  | Distance | Angle | Offset | Stacking Type | Ligand Atoms           |
|-------|---------|-----|----------|-------|--------|---------------|------------------------|
| 1     | 296A    | TYR | 3.82     | 18.26 | 0.67   | P             | 10, 13, 14, 17, 18, 22 |



## Docking Results of Ligand 4

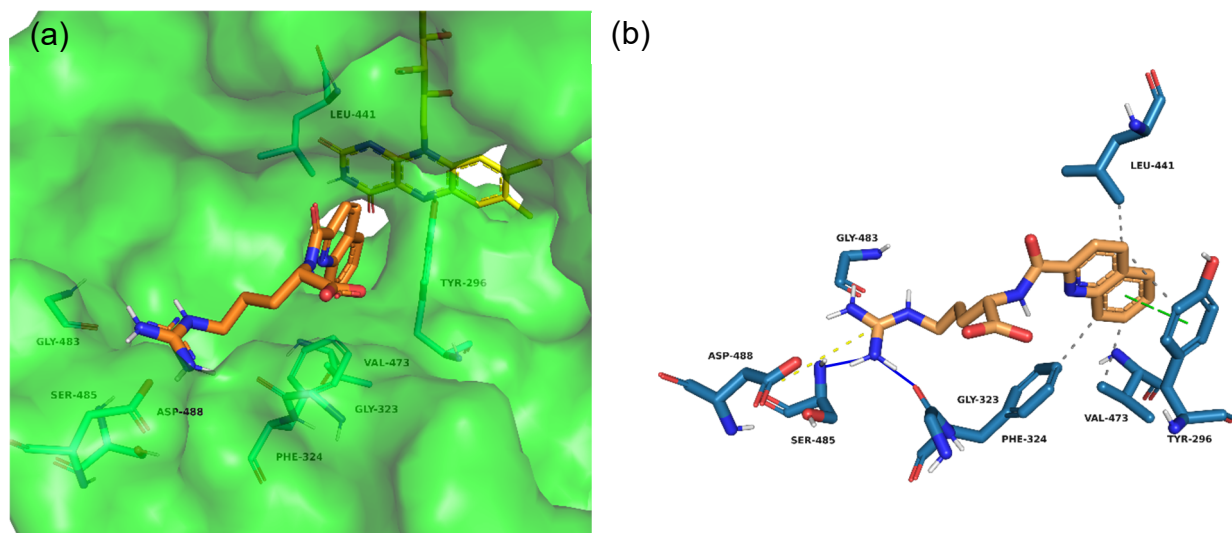

**Figure S4.** Interactions between 4 and SmTGR displayed as docking pose (a) and PLIP analysis (b). The quinoline ring of 4 is occupying the doorstep pocket through  $\pi$ - $\pi$  interactions (parallel displaced, charge transfer) and hydrophobic effects. The arginine residue interacts in a salt bridge with the carboxylate of ASP488 and in a hydrogen bond with the carbonyl oxygen of GLY323. This chain is thereby also targeting the HEPE subpocket. Orange sticks – insect molecule, yellow sticks – FAD, dashed grey lines – hydrophobic interactions, blue lines – hydrogen bonds, dashed green lines –  $\pi$ -stacking (parallel), orange dashed lines – salt bridge.

**Table S4:** Interactions between 4 and SmTGR as observed in the PLIP analysis.

### Hydrophobic Interactions

| Index | Residue | AA  | Distance | Ligand Atom | Protein Atom |
|-------|---------|-----|----------|-------------|--------------|
| 1     | 296A    | TYR | 3.53     | 11          | 4496         |
| 2     | 324A    | PHE | 3.25     | 16          | 4921         |
| 3     | 441A    | LEU | 2.97     | 11          | 6739         |
| 4     | 473A    | VAL | 3.39     | 19          | 7226         |

### Hydrogen Bonds

| Index | Residue | AA  | Distance H-A | Distance D-A | Donor Angle | Protein donor? | Side chain | Donor Atom | Acceptor Atom |
|-------|---------|-----|--------------|--------------|-------------|----------------|------------|------------|---------------|
| 1     | 323A    | GLY | 1.81         | 2.69         | 142.21      | ✗              | ✗          | 24 [Ng+]   | 4907 [O2]     |
| 2     | 323A    | GLY | 3.22         | 3.95         | 132.23      | ✗              | ✗          | 20 [Ng+]   | 4907 [O2]     |
| 3     | 483A    | GLY | 2.70         | 3.23         | 112.80      | ✗              | ✗          | 23 [Ng+]   | 7370 [O2]     |
| 4     | 485A    | SER | 3.14         | 3.92         | 152.43      | ✓              | ✗          | 7393 [Nam] | 24 [Ng+]      |

### $\pi$ -Stacking

| Index | Residue | AA  | Distance | Angle | Offset | Stacking Type | Ligand Atoms           |
|-------|---------|-----|----------|-------|--------|---------------|------------------------|
| 1     | 296A    | TYR | 3.60     | 20.08 | 0.37   | P             | 10, 15, 16, 18, 19, 21 |

### Salt Bridges

| Index | Residue | AA  | Distance | Protein positive? | Ligand Group | Ligand Atoms |
|-------|---------|-----|----------|-------------------|--------------|--------------|
| 1     | 488A    | ASP | 5.05     | ✗                 | Guanidine    | 20, 24, 23   |

## Docking Results of Ligand 5

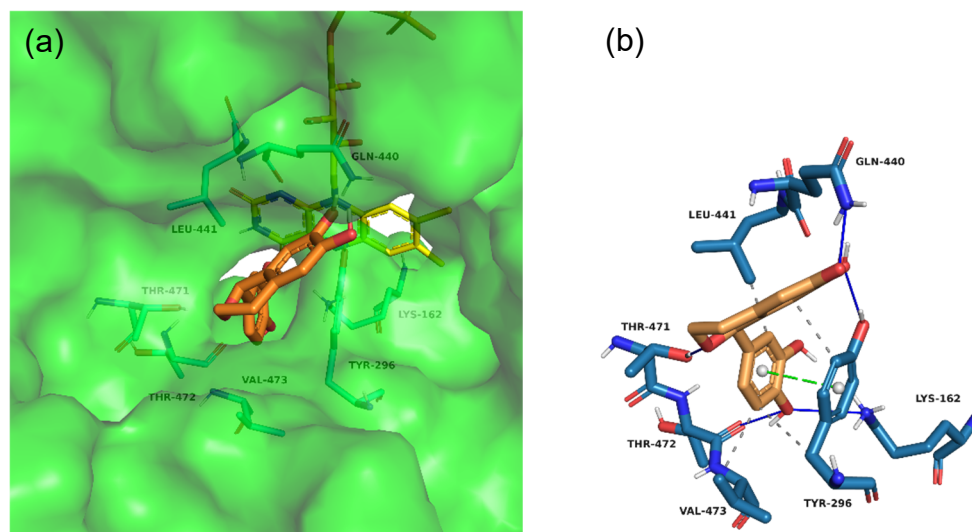

**Figure S5.** Interactions between 5 and SmTGR displayed as docking pose (a) and PLIP analysis (b). The part of the molecule occupying the doorstep pocket is predicted to interact with THR471 and 472 and TYR296 by hydrogen bonding and  $\pi$ - $\pi$  interactions (TYR296) as well as hydrophobic interactions (TYR296). Ligand 5 binds with its phenolic OH-groups to the side chain GLN440-NH<sub>2</sub> and TYR296-OH and thus keeps the TYR296 in this position. Orange sticks – insect molecule, yellow sticks – FAD, dashed grey lines – hydrophobic interactions, blue lines – hydrogen bonds, dashed green lines –  $\pi$ -stacking (parallel), orange dashed lines – salt bridge.

**Table S5:** Interactions between 5 and SmTGR as observed in the PLIP analysis.

### Hydrophobic Interactions \*\*\*\*

| Index | Residue | AA  | Distance | Ligand Atom | Protein Atom |
|-------|---------|-----|----------|-------------|--------------|
| 1     | 296A    | TYR | 3.72     | 14          | 4485         |
| 2     | 296A    | TYR | 3.09     | 8           | 4490         |
| 3     | 441A    | LEU | 2.73     | 9           | 6733         |
| 4     | 473A    | VAL | 3.38     | 14          | 7220         |

### Hydrogen Bonds —

| Index | Residue | AA  | Distance H-A | Distance D-A | Donor Angle | Protein donor? | Side chain | Donor Atom | Acceptor Atom |
|-------|---------|-----|--------------|--------------|-------------|----------------|------------|------------|---------------|
| 1     | 162A    | LYS | 3.27         | 3.78         | 119.35      | ✓              | ✓          | 2397 [N3+] | 20 [O2]       |
| 2     | 296A    | TYR | 2.17         | 2.98         | 161.98      | ✓              | ✓          | 4492 [O3]  | 16 [O2]       |
| 3     | 440A    | GLN | 1.72         | 2.46         | 143.27      | ✓              | ✓          | 6716 [Nam] | 19 [O2]       |
| 4     | 471A    | THR | 3.20         | 4.04         | 176.87      | ✓              | ✓          | 7192 [O3]  | 1 [O3]        |
| 5     | 472A    | THR | 1.67         | 2.49         | 140.04      | ✗              | ✗          | 20 [O2]    | 7203 [O2]     |

### $\pi$ -Stacking ..... ..

| Index | Residue | AA  | Distance | Angle | Offset | Stacking Type | Ligand Atoms         |
|-------|---------|-----|----------|-------|--------|---------------|----------------------|
| 1     | 296A    | TYR | 3.58     | 9.72  | 0.27   | P             | 5, 9, 10, 13, 14, 18 |

## Docking Results of Ligand 6

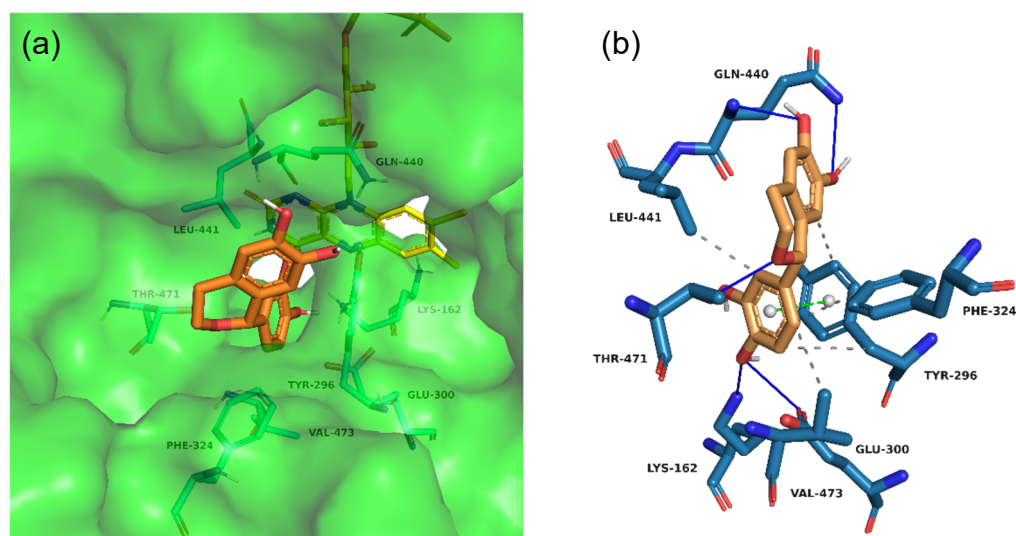

**Figure S6.** Interactions between **6** and SmTGR displayed as docking pose (a) and PLIP analysis (b). Occupation of the doorstep pocket is comparable to **5** but ligand **6** sticks out towards the HEPE subpocket and interacts with the main chain of GLN440. Orange sticks – insect molecule, yellow sticks – FAD, dashed grey lines – hydrophobic interactions, blue lines – hydrogen bonds, dashed green lines –  $\pi$ -stacking (parallel), orange dashed lines – salt bridge.

**Table S6:** Interactions between **6** and SmTGR as observed in the PLIP analysis.

### Hydrophobic Interactions

| Index | Residue | AA  | Distance | Ligand Atom | Protein Atom |
|-------|---------|-----|----------|-------------|--------------|
| 1     | 296A    | TYR | 3.64     | 14          | 4485         |
| 2     | 296A    | TYR | 3.21     | 8           | 4490         |
| 3     | 324A    | PHE | 3.64     | 10          | 4915         |
| 4     | 441A    | LEU | 3.19     | 9           | 6733         |
| 5     | 473A    | VAL | 3.27     | 10          | 7220         |

### Hydrogen Bonds

| Index | Residue | AA  | Distance H-A | Distance D-A | Donor Angle | Protein donor? | Side chain | Donor Atom | Acceptor Atom |
|-------|---------|-----|--------------|--------------|-------------|----------------|------------|------------|---------------|
| 1     | 162A    | LYS | 2.75         | 3.19         | 112.17      | ✓              | ✓          | 2397 [N3+] | 20 [O2]       |
| 2     | 300A    | GLU | 3.29         | 4.09         | 140.69      | ✗              | ✓          | 20 [O2]    | 4554 [O3]     |
| 3     | 440A    | GLN | 2.82         | 3.68         | 174.98      | ✓              | ✓          | 6716 [Nam] | 16 [O2]       |
| 4     | 440A    | GLN | 2.01         | 2.80         | 152.20      | ✓              | ✗          | 6709 [Nam] | 19 [O2]       |
| 5     | 471A    | THR | 1.97         | 2.79         | 164.95      | ✓              | ✓          | 7192 [O3]  | 1 [O3]        |

### $\pi$ -Stacking

| Index | Residue | AA  | Distance | Angle | Offset | Stacking Type | Ligand Atoms         |
|-------|---------|-----|----------|-------|--------|---------------|----------------------|
| 1     | 296A    | TYR | 3.44     | 14.79 | 0.52   | P             | 5, 9, 10, 13, 14, 18 |

## Docking Results of Ligand 7

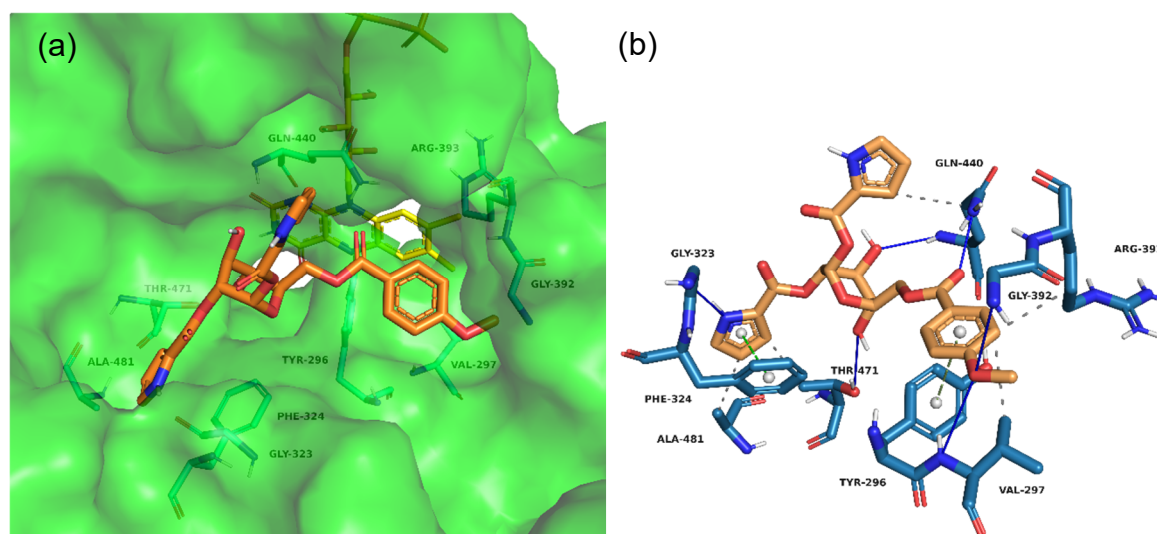

**Figure S7.** Interactions between 7 and SmTGR displayed as docking pose (a) and PLIP analysis (b). One pyrrole-2-carboxylate unit of ligand 7 is able to form  $\pi$ - $\pi$  interactions (parallel displaced) with PHE324 and the methoxy benzene ring with TYR296. The pyrrole-NH also forms a hydrogen bond with the carbonyl oxygen of GLY323. The main chain GLN440-NH is addressed through one glycosidic hydroxy group and the side chain GLN440-NH<sub>2</sub> through the benzoic acid carbonyl group. Thus, 7 is not directly occupying the doorstep pocket, but covers it by extending from the HEPE to the NADPH binding pocket. Orange sticks – insect molecule, yellow sticks – FAD, dashed grey lines – hydrophobic interactions, blue lines – hydrogen bonds, dashed green lines –  $\pi$ -stacking (parallel), orange dashed lines – salt bridge.

**Table S7:** Interactions between 7 and SmTGR as observed in the PLIP analysis.

### Hydrophobic Interactions \*\*\*\*

| Index | Residue | AA  | Distance | Ligand Atom | Protein Atom |
|-------|---------|-----|----------|-------------|--------------|
| 1     | 297A    | VAL | 3.62     | 9           | 4538         |
| 2     | 393A    | ARG | 3.43     | 9           | 6035         |
| 3     | 440A    | GLN | 3.71     | 28          | 6744         |
| 4     | 471A    | THR | 3.60     | 34          | 7221         |
| 5     | 481A    | ALA | 3.92     | 36          | 7374         |

### Hydrogen Bonds —

| Index | Residue | AA  | Distance H-A | Distance D-A | Donor Angle | Protein donor? | Side chain | Donor Atom | Acceptor Atom |
|-------|---------|-----|--------------|--------------|-------------|----------------|------------|------------|---------------|
| 1     | 297A    | VAL | 3.32         | 4.05         | 144.28      | ✓              | ×          | 4532 [Nam] | 17 [O2]       |
| 2     | 323A    | GLY | 2.01         | 2.98         | 159.83      | ×              | ×          | 33 [Npl]   | 4931 [O2]     |
| 3     | 392A    | GLY | 3.45         | 3.94         | 119.28      | ✓              | ×          | 6023 [Nam] | 17 [O2]       |
| 4     | 440A    | GLN | 2.45         | 3.23         | 151.85      | ✓              | ×          | 6739 [Nam] | 20 [O3]       |
| 5     | 440A    | GLN | 1.98         | 2.72         | 144.43      | ✓              | ✓          | 6746 [Nam] | 1 [O3]        |
| 6     | 471A    | THR | 2.98         | 3.78         | 162.33      | ✓              | ✓          | 7222 [O3]  | 15 [O3]       |

### $\pi$ -Stacking .....

| Index | Residue | AA  | Distance | Angle | Offset | Stacking Type | Ligand Atoms       |
|-------|---------|-----|----------|-------|--------|---------------|--------------------|
| 1     | 296A    | TYR | 4.42     | 67.21 | 1.89   | T             | 4, 6, 7, 9, 10, 13 |
| 2     | 324A    | PHE | 3.93     | 26.50 | 0.52   | P             | 30, 33, 34, 35, 36 |

## Docking Results of Ligand 8

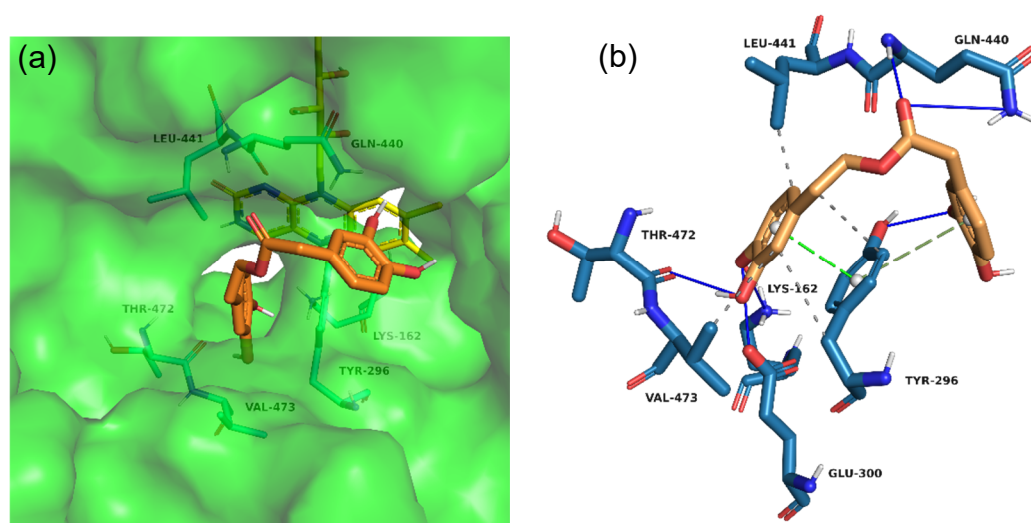

**Figure S8.** Interactions between 8 and SmTGR displayed as docking pose (a) and PLIP analysis (b). The part of the molecule occupying the doorstep pocket is predicted to interact with THR472 and TYR296 by hydrogen bonding and  $\pi$ - $\pi$  interactions (TYR296) as well as hydrophobic interactions (TYR296). Analysis of ligand 8 revealed an additional  $\pi$ - $\pi$  interaction with TYR296 (edge to face) and is thereby extending into the NADPH binding site. Additionally, the carbonyl oxygen of ligand 8 showed a further hydrogen bonding with the main chain GLN440-NH as well as the meta hydroxy group with TYR296-OH, while the para hydroxy group remained unclaimed. Orange sticks – insect molecule, yellow sticks – FAD, dashed grey lines – hydrophobic interactions, blue lines – hydrogen bonds, dashed green lines –  $\pi$ -stacking (parallel), dashed gray lines –  $\pi$ -stacking (edge to face), orange dashed lines – salt bridge.

**Table S8:** Interactions between 8 and SmTGR as observed in the PLIP analysis.

### Hydrophobic Interactions

| Index | Residue | AA  | Distance | Ligand Atom | Protein Atom              |
|-------|---------|-----|----------|-------------|---------------------------|
| 1     | 296A    | TYR | 3.75     | 13          | ID of protein carbon atom |
| 2     | 296A    | TYR | 3.97     | 7           | 4494                      |
| 3     | 441A    | LEU | 2.74     | 14          | 6737                      |
| 4     | 473A    | VAL | 3.88     | 13          | 7224                      |

### Hydrogen Bonds

| Index | Residue | AA  | Distance H-A | Distance D-A | Donor Angle | Protein donor? | Side chain | Donor Atom | Acceptor Atom |
|-------|---------|-----|--------------|--------------|-------------|----------------|------------|------------|---------------|
| 1     | 162A    | LYS | 3.00         | 3.51         | 118.63      | ✓              | ✓          | 2401 [N3+] | 22 [O2]       |
| 2     | 296A    | TYR | 2.12         | 2.74         | 129.95      | ✓              | ✓          | 4496 [O3]  | 15 [O2]       |
| 3     | 300A    | GLU | 2.47         | 3.30         | 142.92      | ✗              | ✓          | 22 [O2]    | 4559 [O-]     |
| 4     | 440A    | GLN | 2.01         | 2.85         | 164.27      | ✓              | ✗          | 6713 [Nam] | 1 [O3]        |
| 5     | 440A    | GLN | 3.33         | 4.00         | 136.73      | ✓              | ✓          | 6720 [Nam] | 1 [O3]        |
| 6     | 472A    | THR | 2.04         | 2.99         | 164.74      | ✗              | ✗          | 20 [O2]    | 7207 [O2]     |

### $\pi$ -Stacking

| Index | Residue | AA  | Distance | Angle | Offset | Stacking Type | Ligand Atoms           |
|-------|---------|-----|----------|-------|--------|---------------|------------------------|
| 1     | 296A    | TYR | 3.46     | 9.33  | 0.39   | P             | 10, 13, 14, 17, 18, 21 |
| 2     | 296A    | TYR | 4.67     | 60.80 | 1.71   | T             | 6, 8, 9, 11, 12, 16    |



## Docking Results of Ligand 9

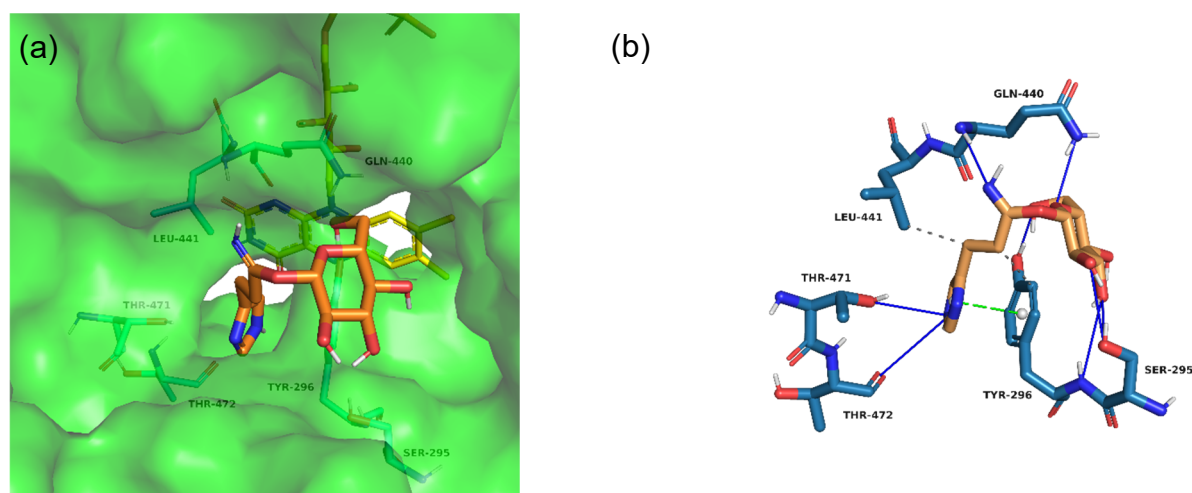

**Figure S9.** Interactions between **9** and SmTGR displayed as docking pose (a) and PLIP analysis (b). Ligand **9** occupies the doorstep pocket with its imidazole ring. Although its NH is not directly addressed by an amino acid, it could interact with the water molecule 760 located in this subpocket (toggle mode was used during docking, allowing water in the binding pocket to be taken into account). The main chain GLN440-NH is addressed through the nitrogen of the carboximide moiety. The glucose unit of ligand **9** extends into the subpocket wherein phosphate and sugar residues are stabilized in the NADPH-bound state. In the case of ligand **9**, hydrogen bonds are formed between the ring-bound oxygen and GLN440-NH<sub>2</sub> as well as between the glycosidic hydroxy groups and TYR296 and SER295. Orange sticks – insect molecule, yellow sticks – FAD, dashed grey lines – hydrophobic interactions, blue lines – hydrogen bonds, dashed green lines –  $\pi$ -stacking (parallel), orange dashed lines – salt bridge.

**Table S9:** Interactions between **9** and SmTGR as observed in the PLIP analysis.

### Hydrophobic Interactions

| Index | Residue | AA  | Distance | Ligand Atom | Protein Atom |
|-------|---------|-----|----------|-------------|--------------|
| 1     | 296A    | TYR | 3.78     | 14          | 4498         |
| 2     | 441A    | LEU | 3.74     | 16          | 6741         |

### Hydrogen Bonds

| Index | Residue | AA  | Distance H-A | Distance D-A | Donor Angle | Protein donor? | Side chain | Donor Atom | Acceptor Atom |
|-------|---------|-----|--------------|--------------|-------------|----------------|------------|------------|---------------|
| 1     | 295A    | SER | 2.59         | 3.39         | 160.88      | ✓              | ✓          | 4483 [O3]  | 9 [O3]        |
| 2     | 295A    | SER | 2.48         | 3.39         | 155.63      | ✗              | ✓          | 9 [O3]     | 4483 [O3]     |
| 3     | 295A    | SER | 2.01         | 2.78         | 134.01      | ✗              | ✓          | 15 [O3]    | 4483 [O3]     |
| 4     | 296A    | TYR | 2.95         | 3.73         | 151.16      | ✓              | ✗          | 4489 [Nam] | 15 [O3]       |
| 5     | 296A    | TYR | 1.82         | 2.65         | 169.76      | ✓              | ✓          | 4500 [O3]  | 12 [O3]       |
| 6     | 296A    | TYR | 1.82         | 2.65         | 140.60      | ✗              | ✓          | 12 [O3]    | 4500 [O3]     |
| 7     | 440A    | GLN | 2.45         | 3.31         | 171.40      | ✓              | ✗          | 6717 [Nam] | 13 [N3]       |
| 8     | 440A    | GLN | 2.36         | 3.20         | 164.10      | ✓              | ✓          | 6724 [Nam] | 1 [O3]        |
| 9     | 471A    | THR | 3.50         | 3.80         | 105.16      | ✓              | ✓          | 7200 [O3]  | 21 [Npl]      |
| 10    | 472A    | THR | 3.44         | 4.07         | 122.40      | ✗              | ✗          | 21 [Npl]   | 7211 [O2]     |

### $\pi$ -Stacking

| Index | Residue | AA  | Distance | Angle | Offset | Stacking Type | Ligand Atoms       |
|-------|---------|-----|----------|-------|--------|---------------|--------------------|
| 1     | 296A    | TYR | 3.43     | 13.95 | 0.63   | P             | 17, 18, 19, 20, 21 |

## Docking Results of Ligand 10

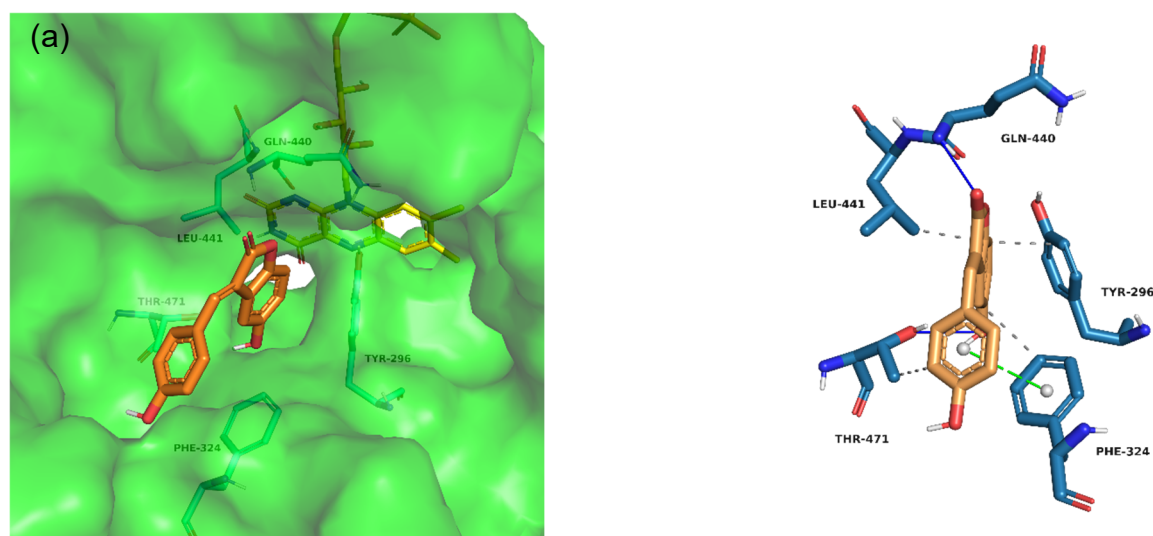

**Figure S10.** Interactions between **10** and SmTGR displayed as docking pose (a) and PLIP analysis (b). The part of the molecule occupying the doorstep pocket is predicted to interact with THR471 by hydrogen bonding and  $\pi$ - $\pi$  interactions (PHE324) as well as hydrophobic interactions (TYR296, PHE324). Analysis of ligand **10** revealed a hydrogen bond between the carbonyl oxygen and the main chain GLN440-NH. Additionally, ligand **10** shows a  $\pi$ - $\pi$  interaction (parallel displaced) with PHE324 and thus additionally occupies the HEPE subpocket. Orange sticks – insect molecule, yellow sticks – FAD, dashed grey lines – hydrophobic interactions, blue lines – hydrogen bonds, dashed green lines –  $\pi$ -stacking (parallel), orange dashed lines – salt bridge.

**Table S10:** Interactions between **10** and SmTGR as observed in the PLIP analysis.

### Hydrophobic Interactions

| Index | Residue | AA  | Distance | Ligand Atom | Protein Atom |
|-------|---------|-----|----------|-------------|--------------|
| 1     | 296A    | TYR | 3.27     | 8           | 4483         |
| 2     | 324A    | PHE | 3.40     | 9           | 4908         |
| 3     | 441A    | LEU | 3.03     | 8           | 6726         |
| 4     | 471A    | THR | 3.38     | 17          | 7184         |

### Hydrogen Bonds

| Index | Residue | AA  | Distance H-A | Distance D-A | Donor Angle | Protein donor? | Side chain | Donor Atom | Acceptor Atom |
|-------|---------|-----|--------------|--------------|-------------|----------------|------------|------------|---------------|
| 1     | 440A    | GLN | 2.15         | 2.97         | 158.30      | ✓              | ✗          | 6702 [Nam] | 1 [O2]        |
| 2     | 471A    | THR | 2.46         | 2.88         | 112.22      | ✓              | ✓          | 7185 [O3]  | 15 [O2]       |
| 3     | 471A    | THR | 2.19         | 2.88         | 126.52      | ✗              | ✓          | 15 [O2]    | 7185 [O3]     |

### $\pi$ -Stacking

| Index | Residue | AA  | Distance | Angle | Offset | Stacking Type | Ligand Atoms           |
|-------|---------|-----|----------|-------|--------|---------------|------------------------|
| 1     | 324A    | PHE | 4.01     | 16.67 | 1.54   | P             | 10, 13, 14, 16, 17, 18 |



### Comparison of docking pose of 1,8-naphthyridine-2-carboxylate (A1) with the crystal structure

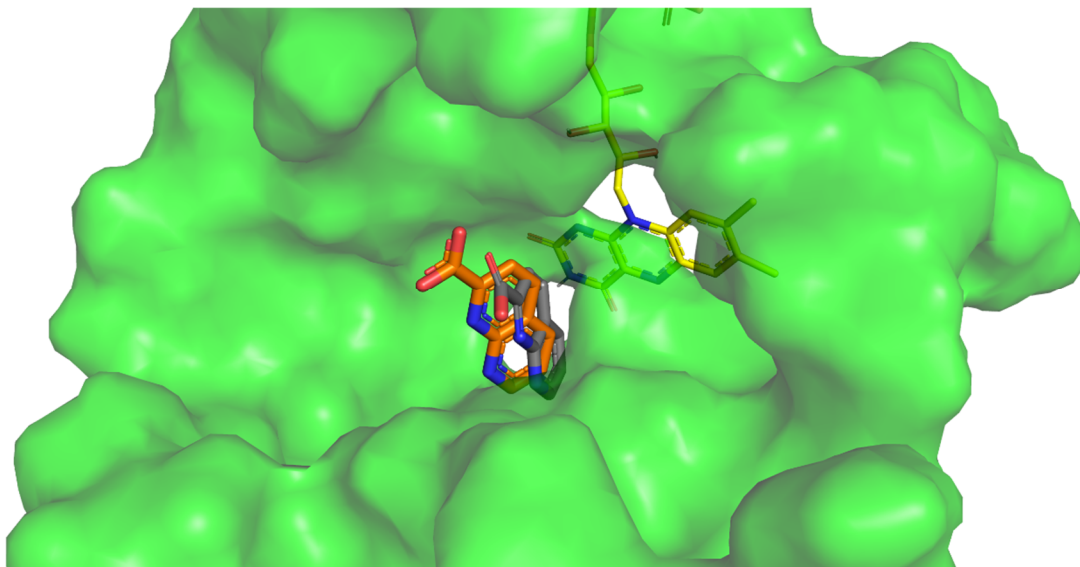

**Figure S11.** Docking of 1,8-naphthyridine-2-carboxylate (A1) in SmTGR to validate the docking procedure. The binding pose obtained in the docking (grey sticks) is comparable to A1 (orange sticks) in the crystal structure (6FP4).
